# Supplementary material for: Rapid high-contrast reversible coloration of Ba3MgSi2O8:Pr3+ photochromic materials for rewritable light-printing
Source: Royal Society of Chemistry journal article supplement (doi:10.1039/d2tc04137e), 2022-01-01
Supplement: d2tc04137e1.pdf [file d2tc04137e1.pdf]

# Supporting Information

## Rapid High-Contrast Reversible Coloration of $\text{Ba}_3\text{MgSi}_2\text{O}_8:\text{Pr}^{3+}$ Photochromic Materials for Rewritable Light-Printing

Wei Tang<sup>†a,b</sup>, Chuandong Zuo<sup>†b,c</sup>, Chaoyang Ma<sup>b,d</sup>, Chen Chang<sup>b,e</sup>, Fan Dang<sup>b</sup>, Hao Liu<sup>b</sup>, Yingkui Li<sup>b</sup>, Xuanyi Yuan<sup>c</sup>, Zicheng Wen<sup>\*b</sup>, Lijun Wu<sup>\*a</sup>, Yongge Cao<sup>\*b,e</sup>

<sup>a</sup>Guangdong Provincial Key Laboratory of Nanophotonic Functional Materials and Devices, School of Information and Optoelectronic Science and Engineering, South China Normal University, Guangzhou 510006, China

<sup>b</sup>Songshan Lake Materials Laboratory, Dongguan, Guangdong 523808, China

<sup>c</sup>Department of Physics, Renmin University of China, Beijing 100872, China

<sup>d</sup>StateKey Laboratory of Luminescent Materials and Devices, South China University of Technology, Guangzhou 510640, China

<sup>e</sup>Beijing National Laboratory for Condensed Matter Physics and Institute of Physics, Chinese Academy of Sciences, Beijing 100190, China

<sup>†</sup>Wei Tang and Chuandong Zuo contribute equally.

\*Co-corresponding author:

E-mail addresses: wenzicheng@sslslab.org.cn, ljwu@scnu.edu.cn,

caoyongge@sslslab.org.cn

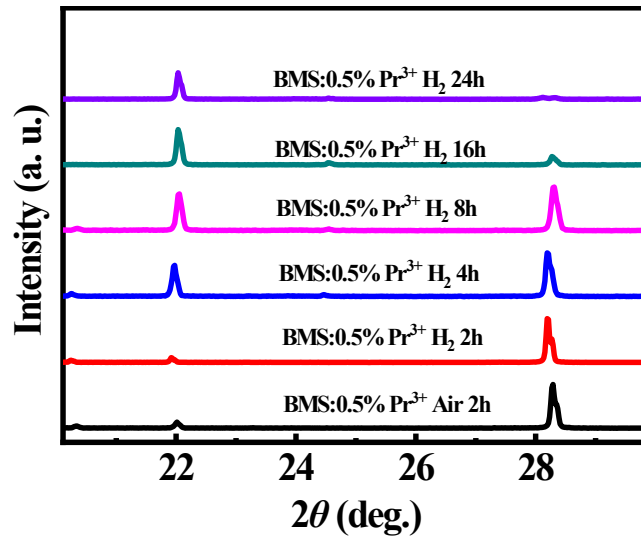

Fig. S1 The fine scanning of XRD spectra in the  $2\theta$  range of 23–29°.

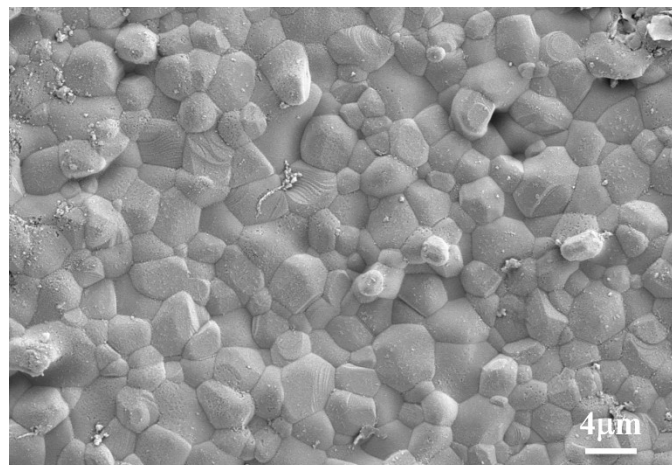

Fig. S2 SEM micrographs of the BMS:0.5%Pr<sup>3+</sup> ceramics

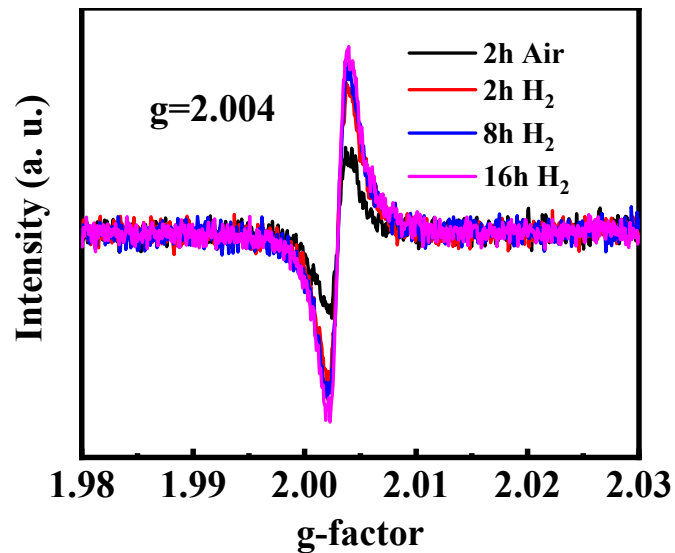

Fig. S3 The EPR results of BMS:0.5%Pr<sup>3+</sup> ceramics sintered in Air for 2h and in reduction atmosphere for 2h, 8h, and 16h before illumination.

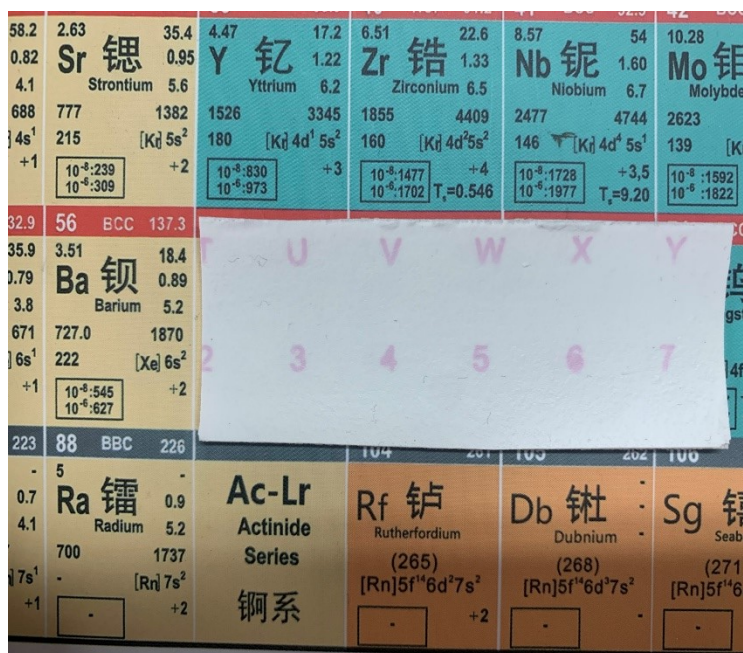

Fig. S4 The rewritable paper after 30 cycles of printing and erasing

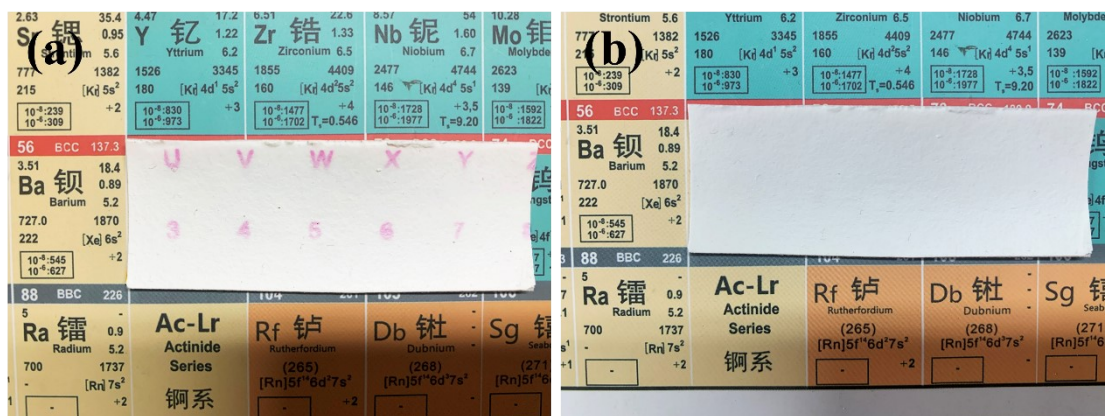

Fig. S5 (a) Light-printing with 254 nm UV-lamp, (b) bleached in 50 °C for 30 minutes.

| category                                                           | Materials                                                                                      | Coloration contrast (%) | Ref.             |
|--------------------------------------------------------------------|------------------------------------------------------------------------------------------------|-------------------------|------------------|
| organic                                                            | poly(ethylene oxide)- <i>b</i> -PSPA                                                           | 88.5                    | 1                |
|                                                                    | diheteroarylethenes                                                                            | 86.6                    | 2                |
|                                                                    | Stenhouse adducts                                                                              | 85.1                    | 3                |
|                                                                    | diarylethene                                                                                   | 72.9                    | 4                |
|                                                                    | m-benzenedicarboxylate                                                                         | 30.8                    | 5                |
| inorganic                                                          | Ba <sub>3</sub> MgSi <sub>2</sub> O <sub>8</sub> : Pr <sup>3+</sup>                            | <b>77.1</b>             | <b>This work</b> |
|                                                                    | Ba(Zr <sub>0.16</sub> Mg <sub>0.28</sub> Ta <sub>0.56</sub> )O <sub>3</sub> : Pr <sup>3+</sup> | 64.1                    | 6                |
|                                                                    | BaMgSiO <sub>4</sub> : Mn <sup>2+</sup>                                                        | 53.5                    | 7                |
|                                                                    | SrBi <sub>2</sub> Nb <sub>2</sub> O <sub>9</sub> :Yb/Ho/Mo                                     | 42.1                    | 8                |
|                                                                    | (K <sub>0.5</sub> Na <sub>0.5</sub> )NbO <sub>3</sub> :Eu                                      | 39.2                    | 9                |
|                                                                    | (K <sub>0.5</sub> Na <sub>0.5</sub> )NbO <sub>3</sub> :Ho/Yb                                   | 39.0                    | 10               |
|                                                                    | Bi <sub>4</sub> Ti <sub>3</sub> O <sub>12</sub> : Pr                                           | 36.7                    | 11               |
|                                                                    | (K <sub>0.5</sub> Na <sub>0.5</sub> )NbO <sub>3</sub> : Nd                                     | 36.4                    | 12               |
|                                                                    | (K <sub>0.5</sub> Na <sub>0.5</sub> )NbO <sub>3</sub> : Sm                                     | 36.1                    | 13               |
|                                                                    | PbWO <sub>4</sub> :Yb <sup>3+</sup> , Er <sup>3+</sup>                                         | 29.4                    | 14               |
|                                                                    | Bi <sub>4</sub> Ti <sub>3</sub> O <sub>12</sub> :Er <sup>3+</sup>                              | 29.0                    | 15               |
|                                                                    | (K <sub>0.5</sub> Na <sub>0.5</sub> )NbO <sub>3</sub> -SrZrO <sub>3</sub> : Sm <sup>3+</sup>   | 29.0                    | 16               |
|                                                                    | (K <sub>0.5</sub> Na <sub>0.5</sub> )NbO <sub>3</sub> : Tb                                     | 26.3                    | 17               |
|                                                                    | BaMgSiO <sub>4</sub> :Eu <sup>3+</sup>                                                         | 24.7                    | 18               |
|                                                                    | BaMgSiO <sub>4</sub> :Bi <sup>3+</sup>                                                         | 24.7                    | 19               |
|                                                                    | Na <sub>0.5</sub> Bi <sub>2.5</sub> Nb <sub>2</sub> O <sub>9</sub> : Er <sup>3+</sup>          | 22.6                    | 20               |
|                                                                    | (K <sub>0.5</sub> Na <sub>0.5</sub> )NbO <sub>3</sub> : Pr/Er                                  | 22.2                    | 21               |
|                                                                    | (K <sub>0.5</sub> Na <sub>0.5</sub> )NbO <sub>3</sub> :Dy                                      | 20.5                    | 22               |
|                                                                    | Na <sub>0.5</sub> Bi <sub>0.5</sub> TiO <sub>3</sub> : Er <sup>3+</sup>                        | 20.0                    | 23               |
|                                                                    | Sr <sub>2</sub> SnO <sub>4</sub> :Sm <sup>3+</sup>                                             | 19.4                    | 24               |
|                                                                    | Na <sub>0.5</sub> Bi <sub>2.5</sub> Nb <sub>2</sub> O <sub>9</sub> :Er <sup>3+</sup>           | 18.4                    | 25               |
|                                                                    | (K <sub>0.5</sub> Na <sub>0.5</sub> )NbO <sub>3</sub> :Pr                                      | 18.1                    | 26               |
|                                                                    | CaWO <sub>4</sub> : Yb <sup>3+</sup> , Er <sup>3+</sup> ,                                      | 18.2                    | 27               |
| KSr <sub>2</sub> Nb <sub>5</sub> O <sub>15</sub> :Sm <sup>3+</sup> | 11.2                                                                                           | 28                      |                  |

Table S1 The coloration contrast of typical ferroelectrics, robust oxides and oorganic photochromic materials

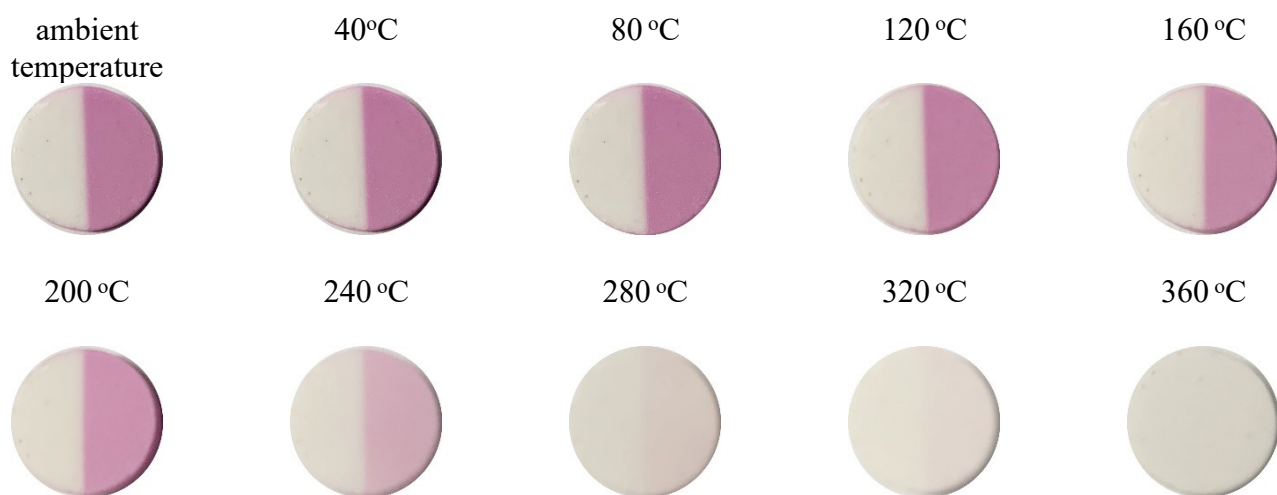

Table S2 The profile display of BMS:0.5%Pr<sup>3+</sup> 16h H<sub>2</sub> after each heat treatment.

#### Supplementary Movies

Movie S1: Instant handwriting with a UV lase (325 nm) on rewritable paper.

## References

1. X. R. Wang, J. M. Hu, G. H. Liu, J. Tian, H. J. Wang, M. Gong and S. Y. Liu, *Journal of the American Chemical Society*, 2015, **137**, 15262-15275.
2. L. Giordano, T. M. Jovin, M. Irie and E. A. Jares-Erijman, *Journal of the American Chemical Society*, 2002, **124**, 7481-7489.
3. S. Helmy, F. A. Leibfarth, S. Oh, J. E. Poelma, C. J. Hawker and J. R. de Alaniz, *Journal of the American Chemical Society*, 2014, **136**, 8169-8172.
4. V. W. W. Yam, C. C. Ko and N. Y. Zhu, *Journal of the American Chemical Society*, 2004, **126**, 12734-12735.
5. H. Y. Li, Y. L. Wei, X. Y. Dong, S. Q. Zang and T. C. W. Mak, *Chemistry of Materials*, 2015, **27**, 1327-1331.
6. W. Tang, C. D. Zuo, C. Y. Ma, Y. Z. Wang, Y. K. Li, X. Y. Yuan, E. G. Wang, Z. C. Wen and Y. G. Cao, *Chem Eng J*, 2022, **435**.
7. Z. T. Yang, J. R. Du, L. I. D. J. Martin, A. Feng, E. Cosaert, B. Zhao, W. L. Liu, R. Van Deun, H. Vrielinck and D. Poelman, *Adv Opt Mater*, 2021.
8. T. Wei, B. Jia, L. H. Shen, C. Z. Zhao, L. W. Wu, B. Zhang, X. Tao, S. C. Wu and Y. Liang, *J. Eur. Ceram. Soc.*, 2020, **40**, 4153-4163.
9. Z. T. Yang, J. R. Du, L. I. D. J. Martin, D. van der Heggen and D. Poelman, *Laser Photonics Rev*, 2021, **15**.
10. H. Q. Sun, Y. Zhang, J. Liu, D. F. Peng, Q. W. Zhang and X. H. Hao, *J. Am. Ceram. Soc.*, 2018, **101**, 5659-5674.
11. T. Wei, F. M. Yang, B. Jia, C. Z. Zhao, L. Y. Liu, H. J. Zhang, Y. Zhang, J. F. Zhang, X. T. Yan and J. T. Yang, *Ceram. Int.*, 2020, **46**, 18507-18517.
12. H. J. Wang, J. F. Lin, B. Y. Deng, T. F. Lin, C. Lin, Y. Cheng, X. Wu, X. H. Zheng and X. Yu, *J Mater Chem C*, 2020, **8**, 2343-2352.
13. J. F. Lin, Y. Zhou, Q. L. Lu, X. Wu, C. Lin, T. F. Lin, K. H. Xue, X. S. Miao, B. S. Sa and Z. M. Sun, *Journal of Materials Chemistry A*, 2019, **7**, 19374-19384.
14. X. Bai, Z. W. Yang, Y. H. Zhan, Z. Hu, Y. T. Ren, M. J. Li, Z. Xu, A. Ullah, I. Khan, J. B. Qu, Z. G. Song, B. T. Liu and Y. H. Wang, *Acs Appl Mater Inter*, 2020, **12**, 21936-21943.
15. F. M. Yang, B. Jia, T. Wei, C. Z. Zhao, Q. J. Zhou, Z. P. Li, M. R. Du, M. C. Wang, Y. Y. Liu and C. Y. Xie, *Inorg Chem Front*, 2019, **6**, 2756-2766.
16. Z. T. Yang, J. R. Du, L. I. D. J. Martin and D. Poelman, *J Eur Ceram Soc*, 2021, **41**, 1925-1933.
17. Q. N. Jia, Q. W. Zhang, H. Q. Sun and X. H. Hao, *J. Eur. Ceram. Soc.*, 2021, **41**, 1211-1220.
18. Y. Zhu, H. Sun, Q. Jia, L. Guan, D. Peng, Q. Zhang and X. Hao, *Advanced Optical Materials*, 2021, **9**, 2001626.
19. Y. T. Ren, Z. W. Yang, Y. H. Wang, M. J. Li, J. B. Qiu, Z. G. Song, J. Yu, A. Ullah and I. Khan, *Sci China Mater*, 2020, **63**, 582-592.
20. Q. W. Zhang, X. W. Zheng, H. Q. Sun, W. Q. Li, X. S. Wang, X. H. Hao and S. L. An, *Acs Appl Mater Inter*, 2016, **8**, 4789-4794.
21. Q. Zhang, J. Tang, P. Du, W. P. Li, G. L. Yuan, Z. F. Liu and L. H. Luo, *J. Eur. Ceram. Soc.*, 2021, **41**, 1904-1916.
22. C. Lin, H. J. Wang, P. Wang, X. Wu, T. F. Lin, B. S. Sa, Y. Cheng, X. H. Zheng, X. Yu and C. Q. Fang, *J Am Ceram Soc*, 2021, **104**, 903-916.
23. K. X. Li, L. H. Luo, Y. Y. Zhang, W. P. Li and Y. F. Hou, *J Am Ceram Soc*, 2018, **101**, 5640-5650.
24. J. Tang, P. Du, W. P. Li, G. L. Yuan, Z. F. Liu and L. H. Luo, *Chem. Eng. J.*, 2021, **410**.
25. X. F. Li, L. L. Guan, Y. Li, H. Q. Sun, Q. W. Zhang and X. H. Hao, *J Mater Chem C*, 2020, **8**, 15685-15696.
26. Q. Zhang, L. H. Luo, J. Gong, P. Du, W. P. Li and G. L. Yuan, *J. Eur. Ceram. Soc.*, 2020, **40**, 3946-3955.
27. X. Bai, Y. K. Cun, Z. Xu, Y. Z. Zi, A. A. Haider, A. Ullah, I. Khan, J. B. Qiu, Z. G. Song and Z. W. Yang, *Chem Eng J*, 2022, **429**.
28. S. Y. Cao, Q. Chen, J. T. Liu, C. Y. Wu, L. L. Li, J. Xu, G. H. Cheng and F. Gao, *J Eur Ceram Soc*, 2020, **40**, 6061-6072.
